# Supplementary material for: Interplay among transcription factors Ets21c, Fos and Ftz-F1 drives JNK-mediated tumor malignancy
Source: Oxford University Press journal article supplement (doi:10.1242/dmm.020719), 2015-01-01
Supplement: dmm020719supp.pdf [file dmm020719supp.pdf]

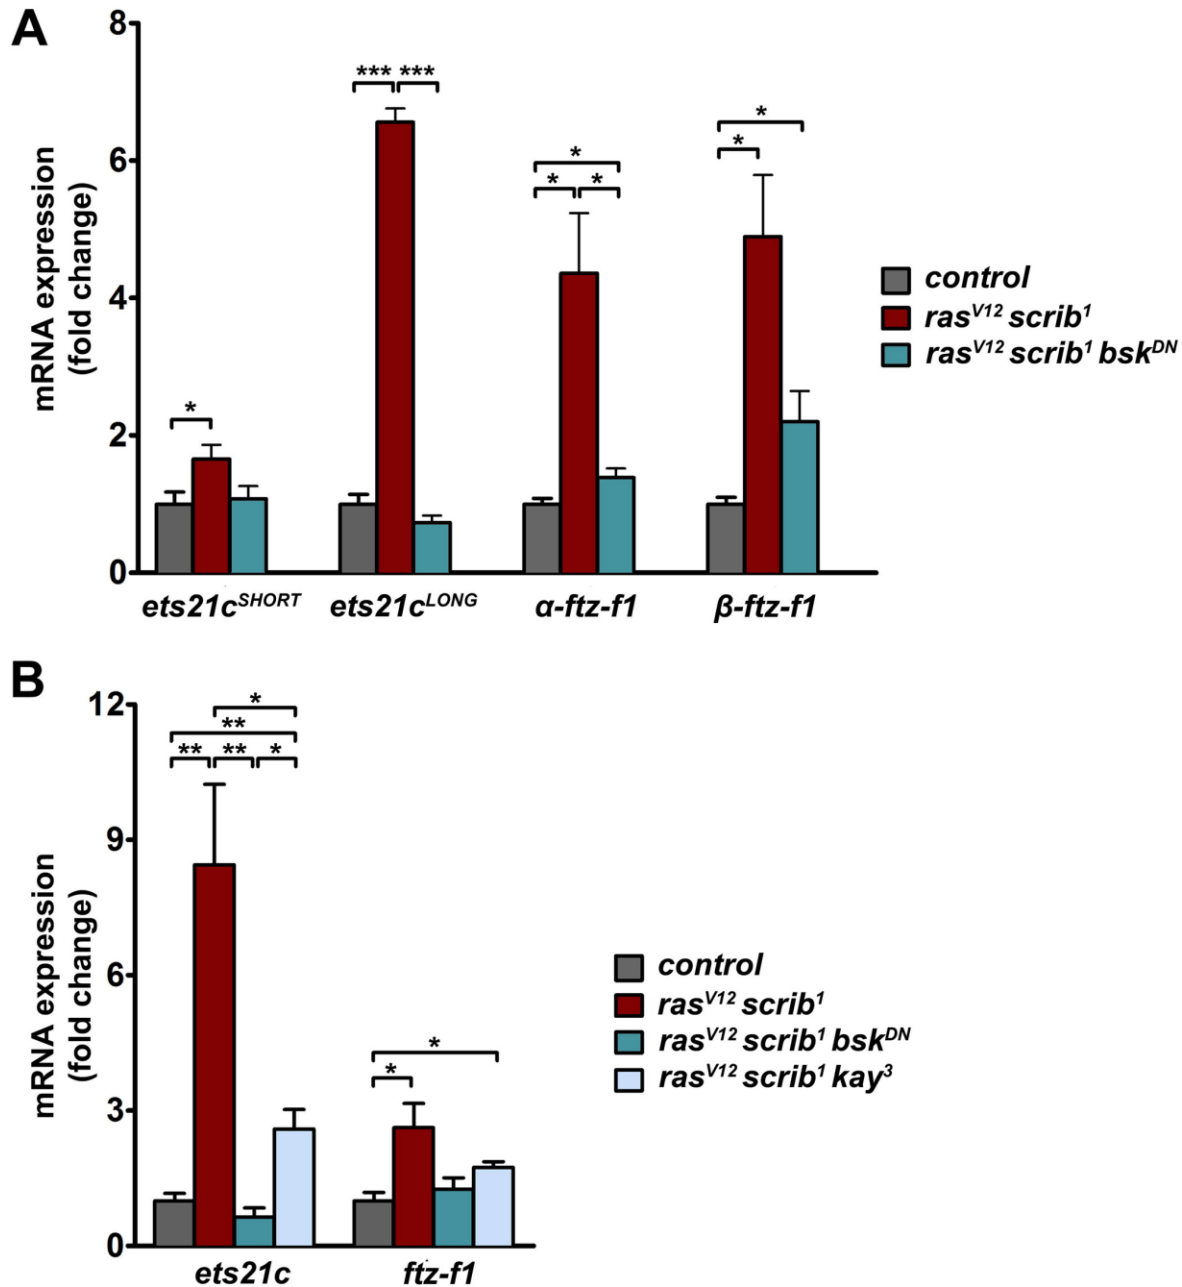

**Supplementary Fig. S1. *ftz-f1* and *ets21c* transcripts are upregulated in *ras*<sup>V12</sup>*scrib*<sup>1</sup> tumors in a JNK-Fos-dependent manner**

Expression of both *ets21c* (*ets21c*<sup>LONG</sup> and *ets21c*<sup>SHORT</sup>) and *ftz-f1* (*α-ftz-f1* and *β-ftz-f1*) isoforms was upregulated in EAD bearing *ras*<sup>V12</sup>*scrib*<sup>1</sup> tumors in a JNK-dependent manner (*ras*<sup>V12</sup>*scrib*<sup>1</sup>*bsk*<sup>DN</sup>), albeit to a different extent as shown by qRT-PCR. **(B)** Loss of *kayak* (*kay*<sup>3</sup>) rescued expression of *ets21c* and *ftz-f1* in *ras*<sup>V12</sup>*scrib*<sup>1</sup> tumors, mimicking the effect of JNK inhibition (*ras*<sup>V12</sup>*scrib*<sup>1</sup>*bsk*<sup>DN</sup>). Data are mean ± s.e.m.; n = 3-5; \*\*\**p* < 0.001; \*\**p* < 0.005; \**p* < 0.01.

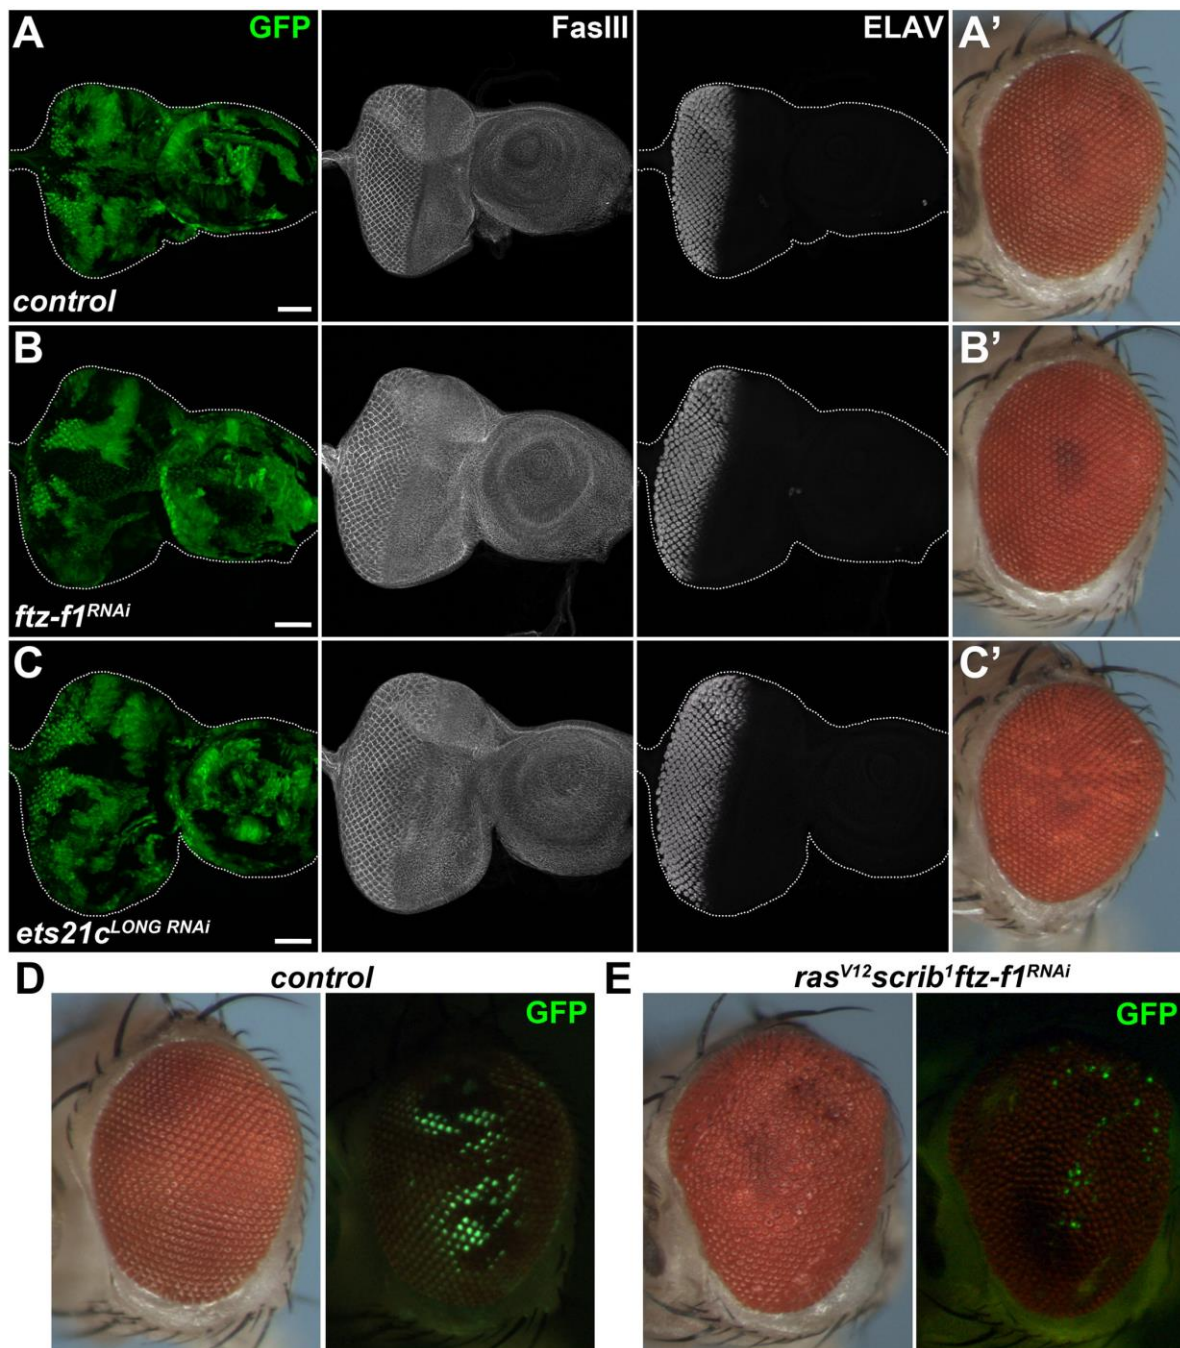

**Supplementary Fig. S2. RNAi mediated knockdown of *ftz-f1* and *ets21c* does not affect normal eye development**

(A-C) Knockdown of *ftz-f1* (B) or *ets21c*<sup>LONG</sup> (C) in clones of the EAD had no obvious impact on EAD morphology (marked by FasIII), photoreceptor differentiation (marked by ELAV) or adult eye development (A'-C'). Images show EAD as projections of multiple confocal sections 6 days AEL. (D-E) Adult eyes of animals bearing *ras*<sup>V12</sup>*scrib*<sup>1</sup>*ftz-f1*<sup>RNAi</sup> are larger than control. Yet most of the ommatidia are GFP negative, indicating expansion of non-clonal tissue. Scale bars: 50  $\mu$ m (A-C).

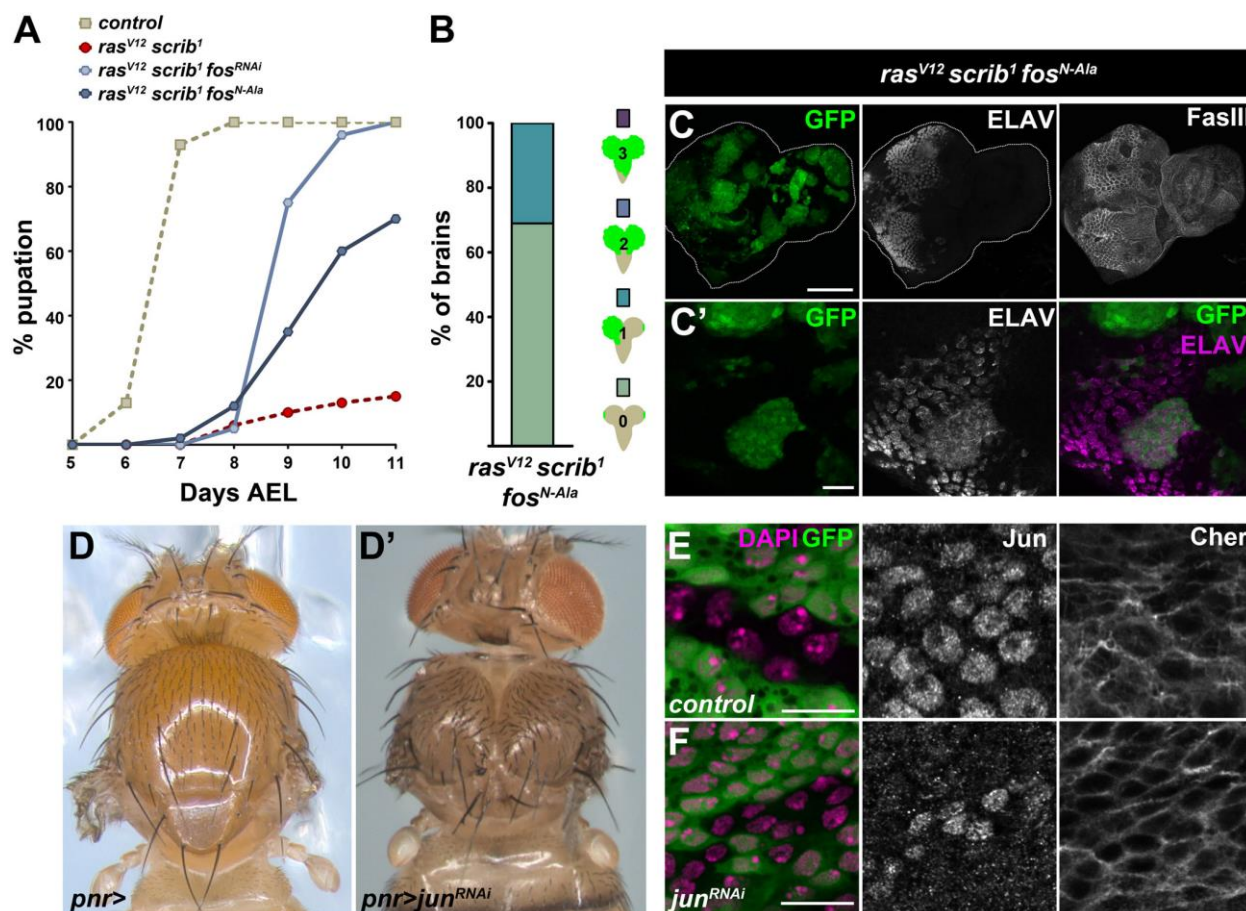

**Supplementary Fig. S3. JNK-mediated phosphorylation of Fos is critical to its oncogenic activity in *ras<sup>V12</sup>scrib<sup>1</sup>* tumors**

(A) Similar to *fos* inhibition via RNAi, expression of *fos<sup>N-Ala</sup>* mutant bearing substitutions of the N-terminal JNK specific phosphorylation sites with alanine in *ras<sup>V12</sup>scrib<sup>1</sup>* clones markedly improved pupation rate ( $p < 0.0001$ ) compared to animals bearing *ras<sup>V12</sup>scrib<sup>1</sup>* tumors. The graph shows cumulative percentage of pupae forming over time. Dashed lines are repeated from Fig. 3. (B) Introduction of *fos<sup>N-Ala</sup>* into *ras<sup>V12</sup>scrib<sup>1</sup>* clones suppressed their invasiveness (see Fig. 3 for comparison with *ras<sup>V12</sup>scrib<sup>1</sup>*). Four grades of invasiveness were scored based on spreading of clonal GFP-positive cells into larval brains dissected on day 7 AEL. Results are percentage of brains falling into each category. (C) While overexpression of *fos<sup>N-Ala</sup>* in *ras<sup>V12</sup>scrib<sup>1</sup>* did not reduce the size of GFP-labeled clones, it partly rescued ELAV expression. (D) *Pannier-GAL4* (*pnr>*) driven *jun<sup>RNAi</sup>* recapitulates a previously reported thorax cleft phenotype (Jindra et al., 2004). (E-F) RNAi knockdown of *jun* in GFP-positive EAD clones results in a depletion of its protein product relative to the surrounding wild-type tissue. Images show EAD dissected 6 days AEL, either as projections of multiple confocal sections (C) or close-up single sections (C', E, F). Scale bars: 100  $\mu$ m (C), 20  $\mu$ m (C') and 10  $\mu$ m for (E, F).

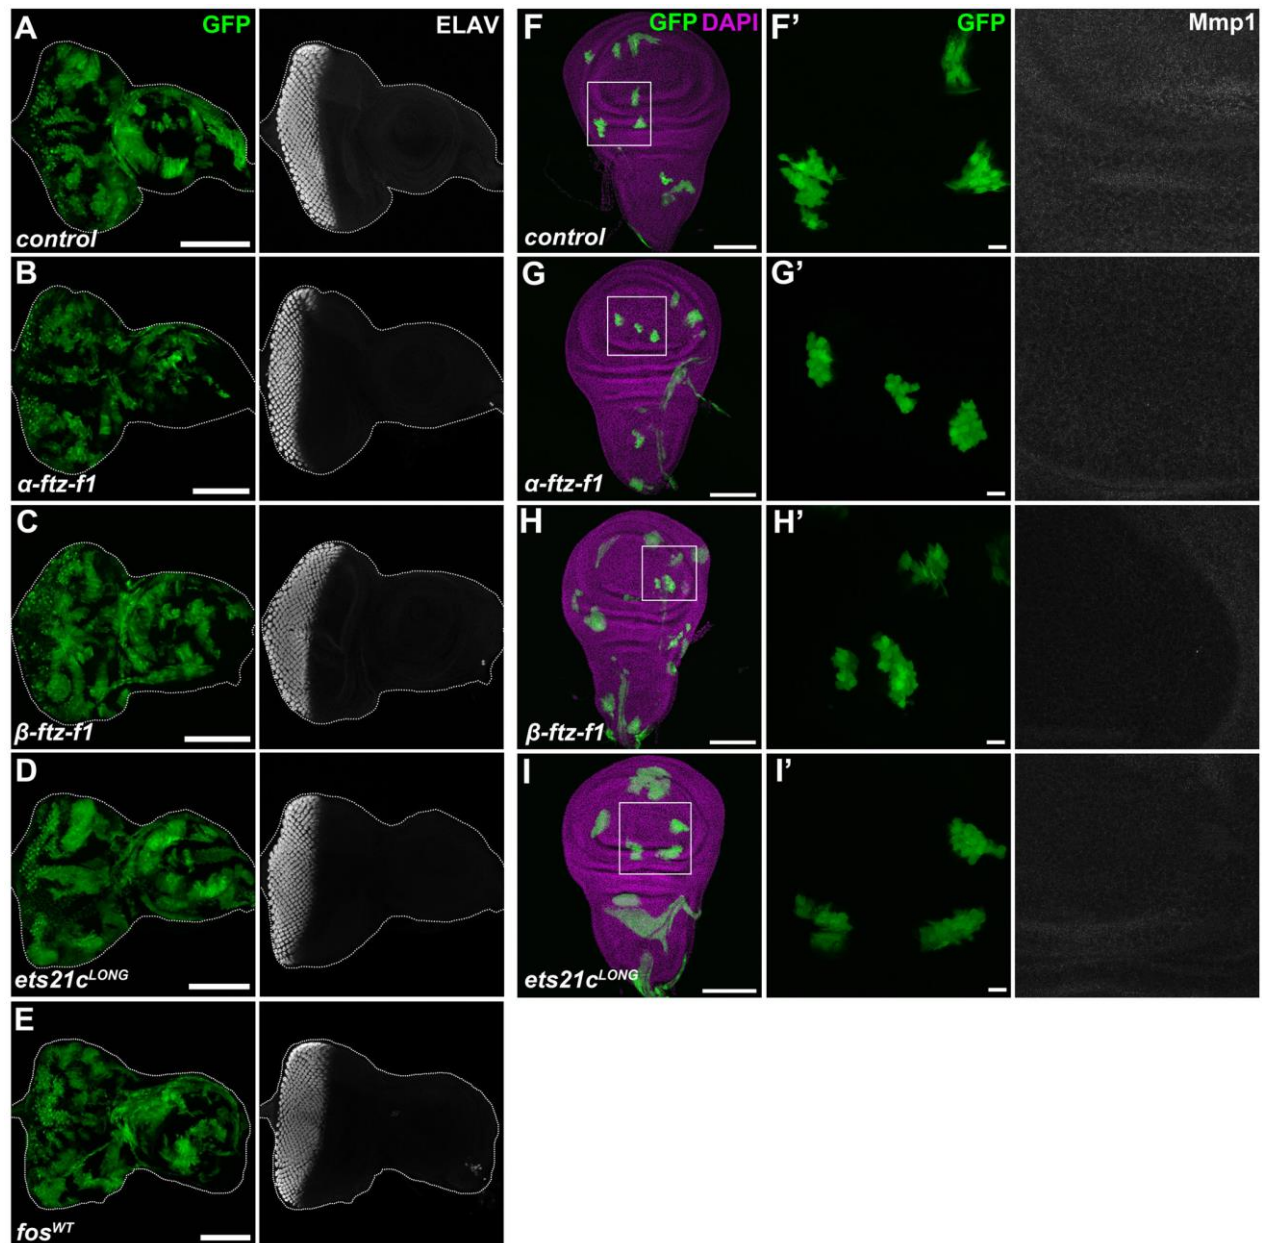

**Supplementary Fig. S4. Clonal overexpression of individual TFs is insufficient to induce MMP1 and causes no obvious phenotypes.**

(A-E) Similar to GFP-labeled control EAD clones (A), overexpression of  $\alpha$ -ftz-f1 (B),  $\beta$ -ftz-f1 (C), *ets21c*<sup>LONG</sup> (D) or *fos*<sup>WT</sup> (E) affected neither clone size nor their morphology or photoreceptor differentiation marked by ELAV. (F-I) Similar to control (F), overexpression of  $\alpha$ -ftz-f1 (G),  $\beta$ -ftz-f1 (H) or *ets21c*<sup>LONG</sup> (I) in clones of wing imaginal discs altered neither clonal morphology nor MMP1 expression (F'-I'). Images are projections of multiple confocal sections of EAD and wing discs on day 6 AEL. Scale bars: 100  $\mu$ m (A-I) and 10  $\mu$ m (F'-I').

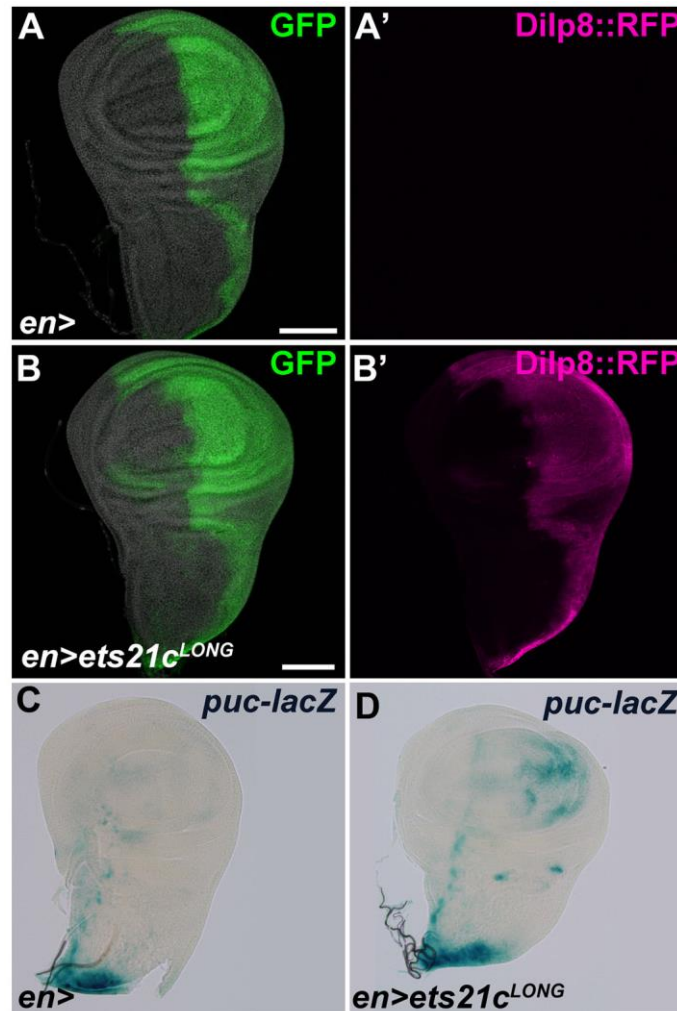

### Supplementary Fig. S5. Ets21c is sufficient to induce *dilp8* and *puc* expression

(A-D) Overexpression of *ets21c* in the posterior compartment of the wing imaginal disc using *engrailed-GAL4*, *UAS-GFP* driver (*en>GFP*) is sufficient to upregulate *Dilp8::RFP* expression (B') and activity of *puc::lacZ* reporter (D). Nuclei are visualized with DAPI. All images show wing disc 6 days AEL as projections of multiple confocal sections. Scale bars: 100  $\mu$ m.

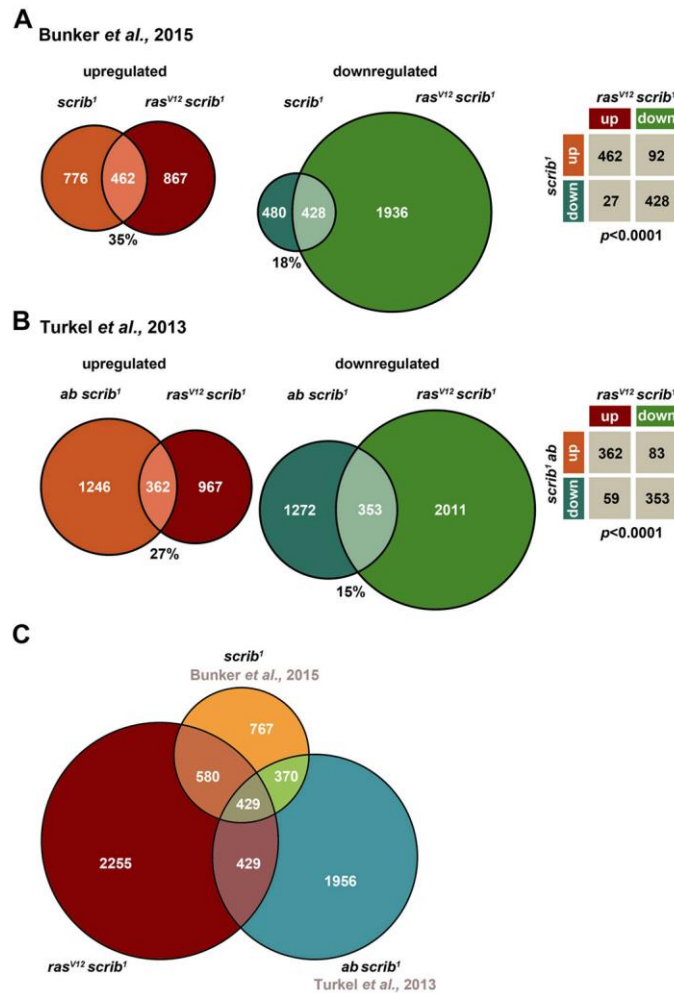

**Supplementary Fig. S6. Tumors with compromised epithelial polarity share “Polarity response transcriptional signature”**

(A-C) Venn diagrams depict overlap of deregulated genes between mosaic EAD bearing malignant *ras<sup>V12</sup>scrib<sup>1</sup>* clones (our study), overgrown *scrib<sup>1</sup>* mutant wing discs (Bunker et al., 2015) or *abrupt scrib<sup>1</sup>* EAD clonal tumors (Turkel et al., 2013). To determine the intersections between different gene expression datasets, we used cut-off of +/-1.5-fold change compared to control for all datasets. The percentages of overlap are given from the perspective of genes regulated in *ras<sup>V12</sup>scrib<sup>1</sup>* that match the other datasets. Contingency tables provide information about directionality of the expression of common transcripts and serve to calculate the significance of overlap using a two-tailed Fisher Exact Probability test. For list of genes see Table S1.

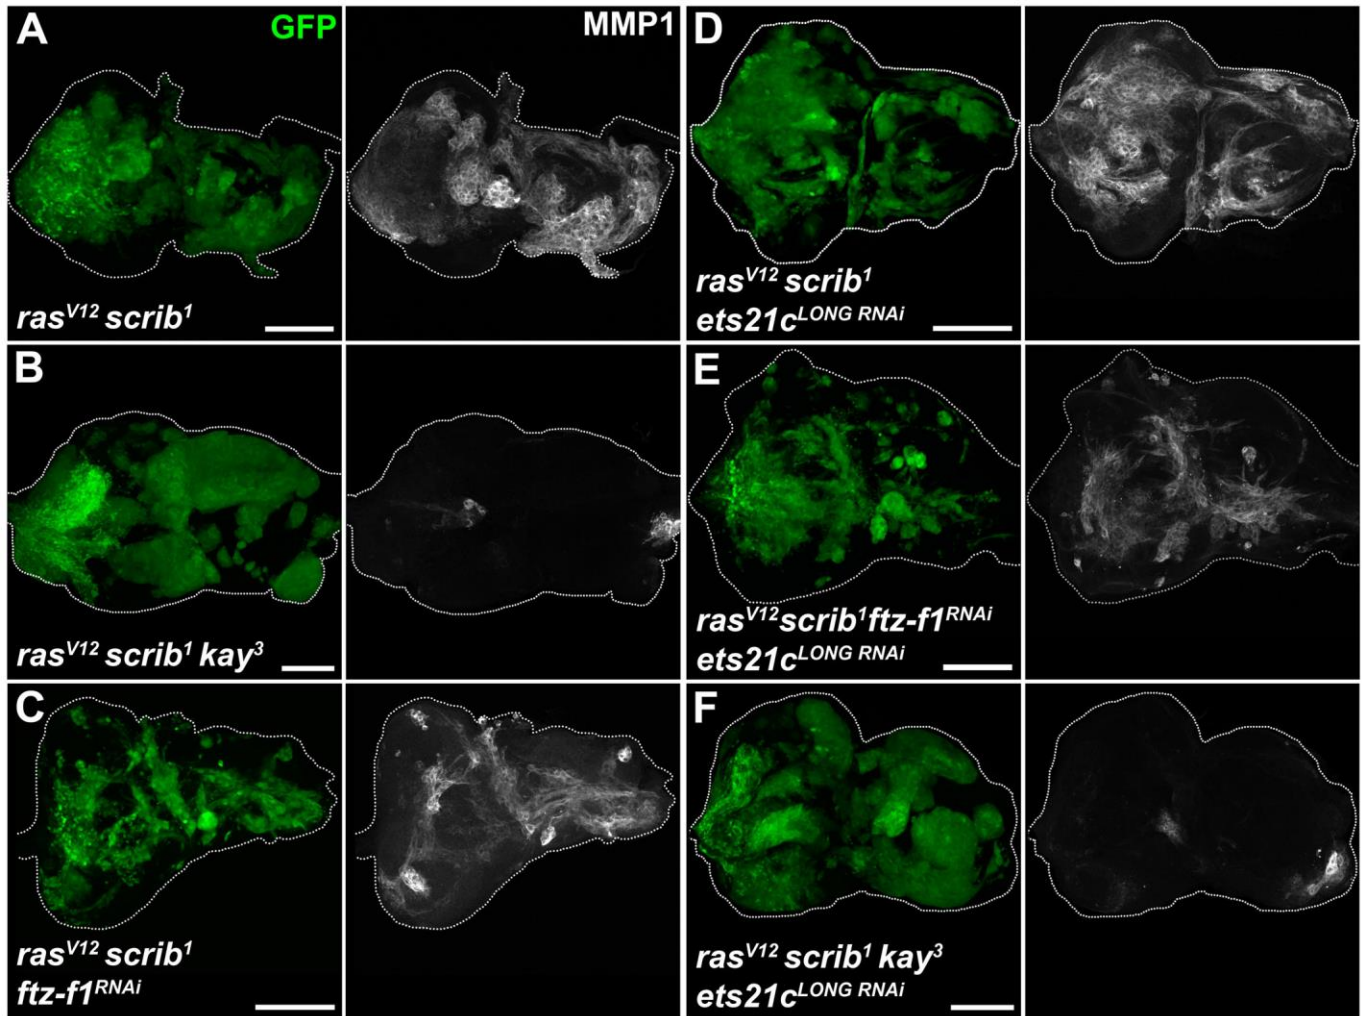

### Supplementary Fig. S7. Fos is the master regulator of MMP1 expression

(A-F) Loss of Fos resulted in dramatic downregulation of MMP1 in clonal tissue while knockdown of *ets21c* or *ftz-f1* or both had no effect. All images show EAD 6 days AEL as projections of multiple confocal sections. Scale bars: 100 μm (A-F).

## Supplementary tables

### Supplementary Table S1. List of differentially expressed genes, enriched GO term clusters, and TF motif analysis and comparative analysis of tumor transcriptomes

[Click here to Download Table S1](#)

### Supplementary Table S2. Primer sets for quantitative reverse transcription-PCR (qRT-PCR) and cloning of *ets21c<sup>LONG</sup>*

|                               | Forward primers (5'=>3')           | Reverse primers (5'=>3')        |
|-------------------------------|------------------------------------|---------------------------------|
|                               | qRT-PCR                            |                                 |
| <i>rp49</i>                   | TCCTACCAGCTTCAAGATGAC              | CACGTTGTGCACCAGGAACT            |
| <i>ets21c<sup>SHORT</sup></i> | ATGAGCGTCAGCGTGGACG                | GAAGATCATCGAGGTGTGCGGATG        |
| <i>ets21c<sup>LONG</sup></i>  | ATTAATGCCATGCATCAGGATGTCCG         | GTGGGAACTTCCGTCTCCTTCG          |
| <i>ets21c</i>                 | ACATGAACTACGACAAGCTGAGCC           | CGTGACCTTGGTCATGATGTTCT         |
| <i>α-ftz-f1</i>               | GGATACCTTCAATGTACCTATGC            | GATGATGGGGCATTAGGAGTTG          |
| <i>β-ftz-f1</i>               | GACCGTACAGTTTATATCGTCGC            | CGTGTAGGCATTGTATTTCGTGC         |
| <i>ftz-f1</i>                 | TCCCTACTGCCGATTCCAGAAG             | TGTACATGGGTCCGAATTTGTTGC        |
| <i>dilp8</i>                  | GCACAACAAGCATCACTACATCA            | GTTGTAGGACCTGCTCGAGTG           |
| <i>mmp1</i>                   | AGGGCGACAAGTACTACAAGCTGA           | ACGTCTTGCCGTTCTTGTAGGTGA        |
| <i>puc</i>                    | CTTCGTCACATGCCAGATTCTC             | AGGCTACTACAGTTAAAAAAGGC         |
| <i>cher</i>                   | ACAAACCCGTGATCCAGGACAA             | AGGCCGGGTCCGTAGGCAG             |
| <i>upd3</i>                   | AGTGAGCACCAAGACTCTGGACAT           | GTGGCGAAGGTTCAACTGTTTGCT        |
|                               | pTMW UAS-based construct           |                                 |
| <i>ets21c<sup>LONG</sup></i>  | AAGAATTCTAATGGCCATTCTACAGAATAGCCGC | AACTCGAGTCAGTTGAATGCATTTGTGGTGG |

**Supplementary Table S3. List of genotypes used for clonal analyses**

| <b>MOSAIC ANALYSES</b>                                  |                                                                                                                         |
|---------------------------------------------------------|-------------------------------------------------------------------------------------------------------------------------|
| <i>hsFLP; act&gt;y<sup>+</sup>&gt;GAL4, UAS-GFP/CyO</i> | <i>ey-FLP1; act&gt;y<sup>+</sup>&gt;GAL4, UAS-GFP; FRT82B, Tub-GAL80</i>                                                |
| <i>w<sup>1118</sup></i>                                 | <i>w;; FRT82B</i>                                                                                                       |
| <i>w; UAS-<math>\alpha</math>-ftz-f1</i>                | <i>w; UAS-ras<sup>V12</sup>; FRT82B/TM6B</i>                                                                            |
| <i>w; UAS-<math>\beta</math>-ftz-f1</i>                 | <i>w; UAS-ras<sup>V12</sup>; FRT82B scrib<sup>1</sup>/TM6B</i>                                                          |
| <i>w; UAS-Myc-ets21c<sup>LONG</sup></i>                 | <i>w; UAS-ras<sup>V12</sup>; FRT82B scrib<sup>1</sup> UAS-bsk<sup>DN</sup>/TM6B</i>                                     |
|                                                         | <i>w; UAS-ras<sup>V12</sup>; FRT82B scrib<sup>1</sup> UAS-fos<sup>35/19</sup> RNAi/TM6B</i>                             |
|                                                         | <i>w; UAS-ras<sup>V12</sup>; FRT82B scrib<sup>1</sup> kay<sup>3</sup>/TM6B</i>                                          |
|                                                         | <i>w; UAS-ras<sup>V12</sup> UAS-jun<sup>RNAi</sup>; FRT82B scrib<sup>1</sup> /TM6B</i>                                  |
|                                                         | <i>w; UAS-ras<sup>V12</sup>; FRT82B scrib<sup>1</sup> UAS-ftz-f1<sup>RNAi</sup>/TM6B</i>                                |
|                                                         | <i>w; UAS-ras<sup>V12</sup> UAS-ets21c<sup>LONG</sup> RNAi; FRT82B scrib<sup>1</sup>/TM6B</i>                           |
|                                                         | <i>w; UAS-ras<sup>V12</sup> UAS-<math>\alpha</math>-ftz-f1; FRT82B/TM6B</i>                                             |
|                                                         | <i>w; UAS-ras<sup>V12</sup> UAS-<math>\beta</math>-ftz-f1; FRT82B/TM6B</i>                                              |
|                                                         | <i>w; UAS-Myc-ets21c<sup>LONG</sup>; FRT82B/TM6B</i>                                                                    |
|                                                         | <i>w;; UAS-ftz-f1<sup>RNAi</sup> FRT82B/TM6B</i>                                                                        |
|                                                         | <i>w; UAS-ets21c<sup>LONG</sup> RNAi; FRT82B/TM6B</i>                                                                   |
|                                                         | <i>w; UAS-ras<sup>V12</sup> UAS-ets21c<sup>LONG</sup> RNAi; FRT82B scrib<sup>1</sup> kay<sup>3</sup>/TM6B</i>           |
|                                                         | <i>w; UAS-ras<sup>V12</sup> UAS-ets21c<sup>LONG</sup> RNAi; FRT82B scrib<sup>1</sup> UAS-ftz-f1<sup>RNAi</sup>/TM6B</i> |
|                                                         | <i>w; UAS-ras<sup>V12</sup> UAS-fos<sup>WT</sup>; FRT82B/TM6B</i>                                                       |
|                                                         | <i>w; UAS-<math>\alpha</math>-ftz-f1; FRT82B/TM6B</i>                                                                   |
|                                                         | <i>w; UAS-<math>\beta</math>-ftz-f1; FRT82B/TM6B</i>                                                                    |
|                                                         | <i>w; UAS-ras<sup>V12</sup> UAS-Myc-ets21c<sup>LONG</sup>; FRT82B/TM6B</i>                                              |
|                                                         | <i>w; UAS-ras<sup>V12</sup> UAS-Myc-ets21c<sup>LONG</sup>; FRT82B UAS-bsk<sup>DN</sup>/TM6B</i>                         |
|                                                         | <i>w; UAS-ras<sup>V12</sup> ex::lacZ; FRT82B scrib<sup>1</sup>/ TM6B</i>                                                |
|                                                         | <i>w; UAS-ras<sup>V12</sup> ex::lacZ; FRT82B scrib<sup>1</sup> UAS-ftz-f1<sup>RNAi</sup>/ TM6B</i>                      |
|                                                         | <i>w; UAS-ras<sup>V12</sup> ex::lacZ; FRT82B scrib<sup>1</sup> kay<sup>3</sup>/TM6B</i>                                 |
